# Supplementary material
Source: Elsevier journal article supplement (https://www.sciencedirect.com/science/article/pii/S2341287921002015)
Supplement: mmc1 [file S2341287921002015:mmc1.docx]

**Anexo 1. Cuestionario de la encuesta sobre pseudociencias del Comité de Medicamentos de la Asociación Española de Pediatría.**

**Sexo:** Varón / Mujer

**Edad:** ≤ 35 años / 36-45 / 46-55 / ≥ 55 años

**Ámbito donde desarrolla actualmente su actividad profesional:** Atención Primaria / Atención Especializada

**Sistema de salud:** Sistema público / Sistema privado.

**Cuestión Número 1. De las siguientes prácticas, señale cuáles considera ciencias y cuáles pseudociencias:** Respuestas posibles: Ciencia / Pseudociencia / No lo sé. Prácticas planteadas: Homeopatía / Reiki o imposición de manos / Magnetoterapia / Acupuntura / Flores de Bach / Medicina Ortomolecular / Iridología / Bioneuroemoción / Limpieza de colon / Cristaloterapia.

**Cuestión Número 2. De las siguientes prácticas, señale cuáles de ellas ha recomendado a algún paciente en alguna ocasión. Recuerde que la encuesta es anónima.** Respuestas posibles: Nunca lo he recomendado / Alguna vez lo he recomendado. Prácticas planteadas: las mismas que en la cuestión anterior.

**Cuestión Número 3 ¿Alguna vez ha recomendado alguna de las prácticas especificadas en el apartado anterior en sustitución de un tratamiento médico convencional? Recuerde que la encuesta es anónima:** Sí / No. **En caso afirmativo, señale cuál o cuáles utilizó en sustitución de un tratamiento médico convencional:** (texto libre). Respuesta no obligatoria.

**Cuestión Número 4. ¿Ha utilizado usted en alguna ocasión alguna de las prácticas mencionadas anteriormente para mejorar su propia salud? Recuerde que la encuesta es anónima:** Sí / No. **En caso afirmativo, señale cuál o cuáles ha utilizado:** (texto libre). Respuesta no obligatoria.

**Cuestión Número 5. En general, usted considera que el uso de las prácticas reconocidas como pseudociencias de manera complementaria a la medicina tradicional:** Es beneficioso para la salud / Es perjudicial para la salud / No es beneficioso ni perjudicial para la salud / No lo sé
